# Supplementary material for: Risk of Dementia in Patients with Diabetes Using Sodium-Glucose Transporter 2 Inhibitors (SGLT2i): A Systematic Review, Meta-Analysis, and Meta-Regression
Source: PubMed Central journal article supplement — Diabetes Ther. 2024 Feb 10;15(3):663–75. doi: 10.1007/s13300-024-01538-1 (PMC10942948; doi:10.1007/s13300-024-01538-1), 2024-02-10
Supplement: 13300_2024_1538_MOESM1_ESM.pdf [file 13300_2024_1538_MOESM1_ESM.pdf]

# **Risk of dementia in patients with diabetes using sodium-glucose transporter-2 inhibitors (SGLT-2i): A systematic review, meta-analysis, and meta-regression**

**Short Title: SGLT-2i and dementia**

**Pricilla Yani Gunawan<sup>1\*</sup>, Paskalis Andrew Gunawan<sup>2</sup>, Timotius Ivan Hariyanto<sup>3</sup>**

<sup>1</sup>Department of Neurology, Pelita Harapan University, Karawaci, Tangerang, 15811, Indonesia

<sup>2</sup>Division of Geriatric Medicine, Department of Internal Medicine, Faculty of Medicine, Tarumanegara University, Jakarta, 11440, Indonesia

<sup>3</sup>Faculty of Medicine, Pelita Harapan University, Karawaci, Tangerang, 15811, Indonesia

**\*Corresponding author:** Pricilla Yani Gunawan; Department of Neurology, Faculty of Medicine, Pelita Harapan University, Boulevard Jendral Sudirman street, Karawaci, Tangerang, Indonesia 15811; Email: [pricilla.yani@outlook.com](mailto:pricilla.yani@outlook.com); Tel: +6285218372284; Orcid ID: <https://orcid.org/0000-0002-5620-3267>

## Supplementary Table 1. Literature search strategy

### 1A. Medline and Europe PMC Search String:

“(sodium glucose transporter-2 OR SGLT-2 OR sodium glucose transporter-2 inhibitors OR SGLT-2i OR canagliflozin OR dapagliflozin OR empagliflozin OR ertugliflozin) AND (diabetes OR diabetes mellitus OR DM OR type 1 diabetes OR T1D OR type 2 diabetes OR T2D) AND (dementia OR Alzheimer’s dementia OR AD OR vascular dementia OR VaD OR Lewy body dementia OR LBD OR frontotemporal dementia OR FTD)”

### 1B. Example Scopus and Cochrane Library Search Strategy:

- |                                            |                                               |
|--------------------------------------------|-----------------------------------------------|
| 1. sodium glucose transporter-2            | 16. dementia                                  |
| 2. SGLT-2                                  | 17. Alzheimer’s dementia                      |
| 3. sodium glucose transporter-2 inhibitors | 18. AD                                        |
| 4. SGLT-2i                                 | 19. vascular dementia                         |
| 5. canagliflozin                           | 20. VaD                                       |
| 6. dapagliflozin                           | 21. Lewy body dementia                        |
| 7. empagliflozin                           | 22. LBD                                       |
| 8. ertugliflozin                           | 23. frontotemporal dementia                   |
| 9. diabetes                                | 24. FTD                                       |
| 10. diabetes mellitus                      | 25. 1 or 2 or 3 or 4 or 5 or 6 or 7 or 8      |
| 11. DM                                     | 26. 9 or 10 or 11 or 12 or 13 or 14 or 15     |
| 12. type 1 diabetes                        | 27. 16 or 17 or 18 or 19 or 20 or 21 or 22 or |
| 13. T1D                                    | 23 or 24                                      |
| 14. type 2 diabetes                        | 28. 25 and 26 and 27                          |
| 15. T2D                                    |                                               |

**Supplementary Table 2. Results for the meta-regression models for incidence of Dementia**

| <b>Incidence of Dementia</b> |               |               |               |               |                 |
|------------------------------|---------------|---------------|---------------|---------------|-----------------|
| Covariate                    | Coefficient   | 95% CI (min)  | 95% CI (max)  | S.E.          | <i>p</i> -value |
| Sample size                  | 0.0000        | -0.0000       | 0.0000        | 0.0000        | 0.2954          |
| Study duration               | -0.0732       | -0.1580       | 0.0116        | 0.0433        | 0.0908          |
| Age                          | 0.0501        | -0.0061       | 0.1062        | 0.0286        | 0.0805          |
| Sex                          | -0.0372       | -0.1468       | 0.0724        | 0.0559        | 0.5058          |
| Hypertension                 | 0.0189        | -0.0009       | 0.0386        | 0.0101        | 0.0609          |
| Cardiovascular disease       | 0.0107        | -0.0043       | 0.0256        | 0.0076        | 0.1619          |
| <b>Dyslipidemia</b>          | <b>0.0211</b> | <b>0.0095</b> | <b>0.0327</b> | <b>0.0059</b> | <b>0.0004</b>   |
| Stroke                       | 0.0529        | -0.0417       | 0.1475        | 0.0483        | 0.2734          |

**A. Regression of Log odds ratio on Dyslipidemia**

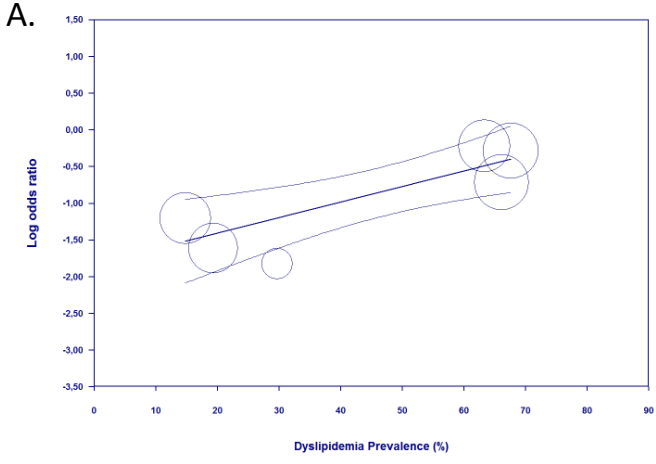

**B. Regression of Log odds ratio on Sample size**

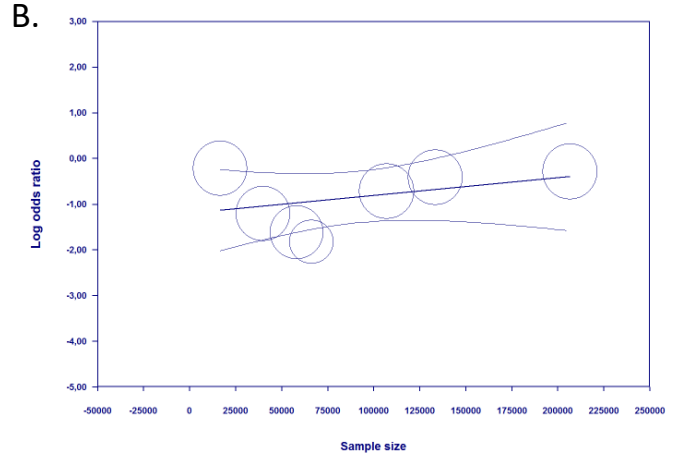

**C. Regression of Log odds ratio on Study duration**

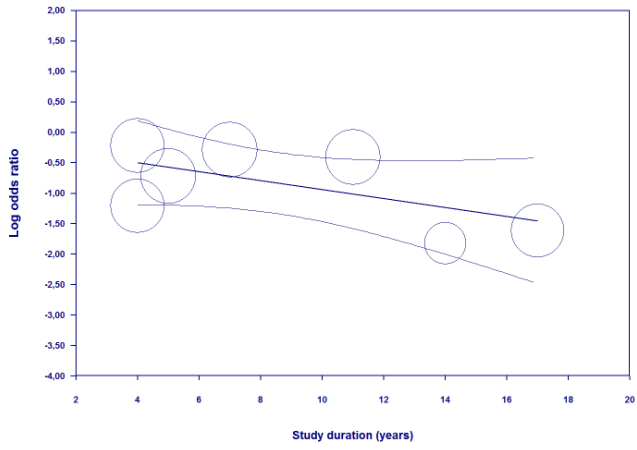

**D. Regression of Log odds ratio on Age**

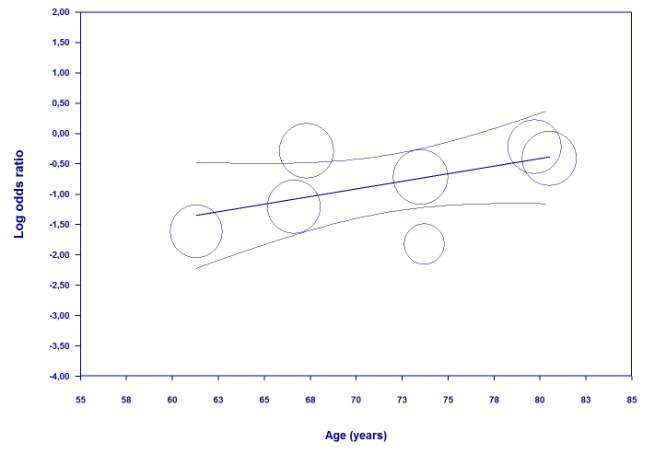

**E. Regression of Log odds ratio on Male Sex**

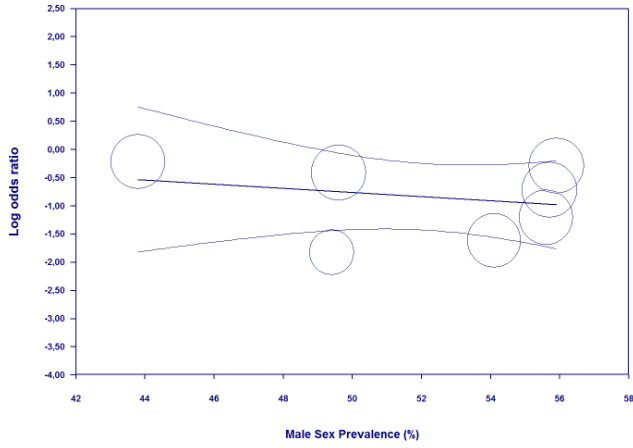

**F. Regression of Log odds ratio on Hypertension**

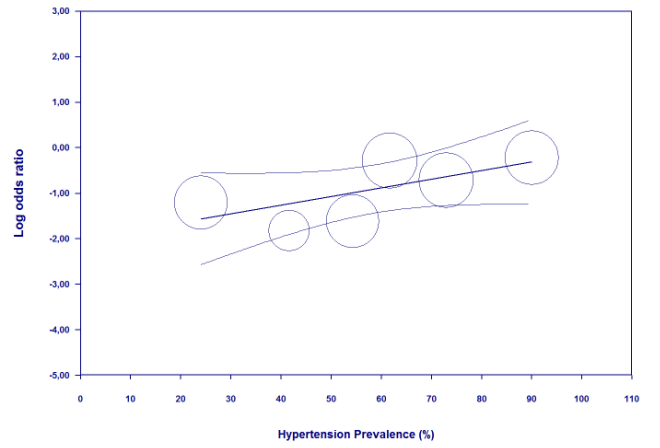

**G. Regression of Log odds ratio on Cardiovascular disease**

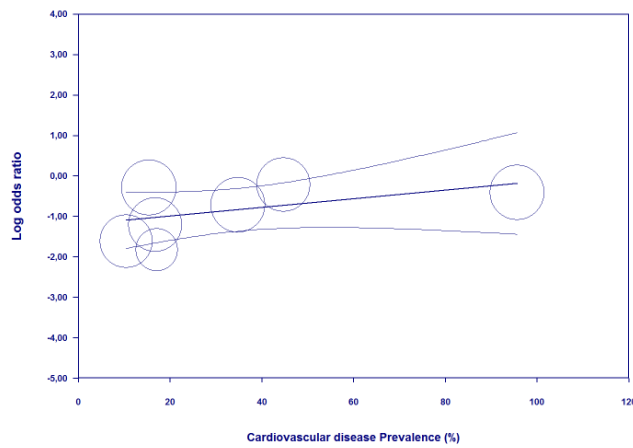

**H. Regression of Log odds ratio on Stroke**

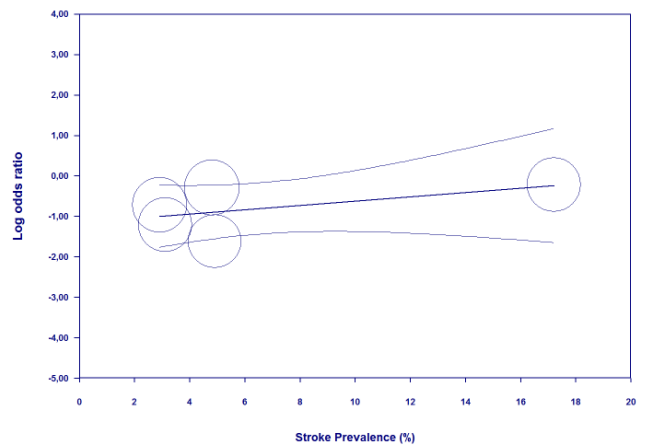

Supplementary Figure 1. Bubble-plot for meta-regression. Meta-regression analysis showed that the association between sodium glucose transporter-2 inhibitor (SGLT-2i) use and incidence of dementia was significantly affected only by dyslipidemia (A), but not by sample size (B), study duration (C), age (D), sex (E), hypertension (F), cardiovascular disease (G), nor stroke (H).

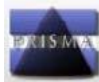

# PRISMA 2020 Checklist

| Section and Topic             | Item # | Checklist item                                                                                                                                                                                                                                                                                       | Location where item is reported |
|-------------------------------|--------|------------------------------------------------------------------------------------------------------------------------------------------------------------------------------------------------------------------------------------------------------------------------------------------------------|---------------------------------|
| <b>TITLE</b>                  |        |                                                                                                                                                                                                                                                                                                      |                                 |
| Title                         | 1      | Identify the report as a systematic review.                                                                                                                                                                                                                                                          | 1                               |
| <b>ABSTRACT</b>               |        |                                                                                                                                                                                                                                                                                                      |                                 |
| Abstract                      | 2      | See the PRISMA 2020 for Abstracts checklist.                                                                                                                                                                                                                                                         | 2                               |
| <b>INTRODUCTION</b>           |        |                                                                                                                                                                                                                                                                                                      |                                 |
| Rationale                     | 3      | Describe the rationale for the review in the context of existing knowledge.                                                                                                                                                                                                                          | 4                               |
| Objectives                    | 4      | Provide an explicit statement of the objective(s) or question(s) the review addresses.                                                                                                                                                                                                               | 5                               |
| <b>METHODS</b>                |        |                                                                                                                                                                                                                                                                                                      |                                 |
| Eligibility criteria          | 5      | Specify the inclusion and exclusion criteria for the review and how studies were grouped for the syntheses.                                                                                                                                                                                          | 5                               |
| Information sources           | 6      | Specify all databases, registers, websites, organisations, reference lists and other sources searched or consulted to identify studies. Specify the date when each source was last searched or consulted.                                                                                            | 6                               |
| Search strategy               | 7      | Present the full search strategies for all databases, registers and websites, including any filters and limits used.                                                                                                                                                                                 | 6                               |
| Selection process             | 8      | Specify the methods used to decide whether a study met the inclusion criteria of the review, including how many reviewers screened each record and each report retrieved, whether they worked independently, and if applicable, details of automation tools used in the process.                     | 6                               |
| Data collection process       | 9      | Specify the methods used to collect data from reports, including how many reviewers collected data from each report, whether they worked independently, any processes for obtaining or confirming data from study investigators, and if applicable, details of automation tools used in the process. | 7                               |
| Data items                    | 10a    | List and define all outcomes for which data were sought. Specify whether all results that were compatible with each outcome domain in each study were sought (e.g. for all measures, time points, analyses), and if not, the methods used to decide which results to collect.                        | 7                               |
|                               | 10b    | List and define all other variables for which data were sought (e.g. participant and intervention characteristics, funding sources). Describe any assumptions made about any missing or unclear information.                                                                                         | 7                               |
| Study risk of bias assessment | 11     | Specify the methods used to assess risk of bias in the included studies, including details of the tool(s) used, how many reviewers assessed each study and whether they worked independently, and if applicable, details of automation tools used in the process.                                    | 7                               |
| Effect measures               | 12     | Specify for each outcome the effect measure(s) (e.g. risk ratio, mean difference) used in the synthesis or presentation of results.                                                                                                                                                                  | 8                               |
| Synthesis methods             | 13a    | Describe the processes used to decide which studies were eligible for each synthesis (e.g. tabulating the study intervention characteristics and comparing against the planned groups for each synthesis (item #5)).                                                                                 | 8                               |
|                               | 13b    | Describe any methods required to prepare the data for presentation or synthesis, such as handling of missing summary statistics, or data conversions.                                                                                                                                                | 8                               |
|                               | 13c    | Describe any methods used to tabulate or visually display results of individual studies and syntheses.                                                                                                                                                                                               | 8                               |
|                               | 13d    | Describe any methods used to synthesize results and provide a rationale for the choice(s). If meta-analysis was performed, describe the model(s), method(s) to identify the presence and extent of statistical heterogeneity, and software package(s) used.                                          | 8                               |
|                               | 13e    | Describe any methods used to explore possible causes of heterogeneity among study results (e.g. subgroup analysis, meta-regression).                                                                                                                                                                 | 8                               |
|                               | 13f    | Describe any sensitivity analyses conducted to assess robustness of the synthesized results.                                                                                                                                                                                                         | 8                               |
| Reporting bias assessment     | 14     | Describe any methods used to assess risk of bias due to missing results in a synthesis (arising from reporting biases).                                                                                                                                                                              | 8                               |
| Certainty assessment          | 15     | Describe any methods used to assess certainty (or confidence) in the body of evidence for an outcome.                                                                                                                                                                                                | 8                               |

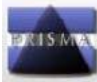

# PRISMA 2020 Checklist

| Section and Topic                              | Item # | Checklist item                                                                                                                                                                                                                                                                       | Location where item is reported |
|------------------------------------------------|--------|--------------------------------------------------------------------------------------------------------------------------------------------------------------------------------------------------------------------------------------------------------------------------------------|---------------------------------|
| <b>RESULTS</b>                                 |        |                                                                                                                                                                                                                                                                                      |                                 |
| Study selection                                | 16a    | Describe the results of the search and selection process, from the number of records identified in the search to the number of studies included in the review, ideally using a flow diagram.                                                                                         | 8                               |
|                                                | 16b    | Cite studies that might appear to meet the inclusion criteria, but which were excluded, and explain why they were excluded.                                                                                                                                                          | 8                               |
| Study characteristics                          | 17     | Cite each included study and present its characteristics.                                                                                                                                                                                                                            | 9                               |
| Risk of bias in studies                        | 18     | Present assessments of risk of bias for each included study.                                                                                                                                                                                                                         | 9                               |
| Results of individual studies                  | 19     | For all outcomes, present, for each study: (a) summary statistics for each group (where appropriate) and (b) an effect estimate and its precision (e.g. confidence/credible interval), ideally using structured tables or plots.                                                     | 9                               |
| Results of syntheses                           | 20a    | For each synthesis, briefly summarise the characteristics and risk of bias among contributing studies.                                                                                                                                                                               | 9                               |
|                                                | 20b    | Present results of all statistical syntheses conducted. If meta-analysis was done, present for each the summary estimate and its precision (e.g. confidence/credible interval) and measures of statistical heterogeneity. If comparing groups, describe the direction of the effect. | 9                               |
|                                                | 20c    | Present results of all investigations of possible causes of heterogeneity among study results.                                                                                                                                                                                       | 9                               |
|                                                | 20d    | Present results of all sensitivity analyses conducted to assess the robustness of the synthesized results.                                                                                                                                                                           | 9                               |
| Reporting biases                               | 21     | Present assessments of risk of bias due to missing results (arising from reporting biases) for each synthesis assessed.                                                                                                                                                              | 10                              |
| Certainty of evidence                          | 22     | Present assessments of certainty (or confidence) in the body of evidence for each outcome assessed.                                                                                                                                                                                  | 10                              |
| <b>DISCUSSION</b>                              |        |                                                                                                                                                                                                                                                                                      |                                 |
| Discussion                                     | 23a    | Provide a general interpretation of the results in the context of other evidence.                                                                                                                                                                                                    | 10                              |
|                                                | 23b    | Discuss any limitations of the evidence included in the review.                                                                                                                                                                                                                      | 13                              |
|                                                | 23c    | Discuss any limitations of the review processes used.                                                                                                                                                                                                                                | 13                              |
|                                                | 23d    | Discuss implications of the results for practice, policy, and future research.                                                                                                                                                                                                       | 14                              |
| <b>OTHER INFORMATION</b>                       |        |                                                                                                                                                                                                                                                                                      |                                 |
| Registration and protocol                      | 24a    | Provide registration information for the review, including register name and registration number, or state that the review was not registered.                                                                                                                                       | 5                               |
|                                                | 24b    | Indicate where the review protocol can be accessed, or state that a protocol was not prepared.                                                                                                                                                                                       | 5                               |
|                                                | 24c    | Describe and explain any amendments to information provided at registration or in the protocol.                                                                                                                                                                                      | 5                               |
| Support                                        | 25     | Describe sources of financial or non-financial support for the review, and the role of the funders or sponsors in the review.                                                                                                                                                        | 15                              |
| Competing interests                            | 26     | Declare any competing interests of review authors.                                                                                                                                                                                                                                   | 15                              |
| Availability of data, code and other materials | 27     | Report which of the following are publicly available and where they can be found: template data collection forms; data extracted from included studies; data used for all analyses; analytic code; any other materials used in the review.                                           | 15                              |
